# Supplementary material for: Light intensity–directed selective CO2 photoreduction using iron(0)–zirconium dioxide photocatalyst
Source: Royal Society of Chemistry journal article supplement (doi:10.1039/d5cc01147g), 2025-01-01
Supplement: d5cc01147g1.pdf [file d5cc01147g1.pdf]

Electronic Supporting Information (ESI)

## Light intensity-directed selective CO<sub>2</sub> photoreduction using iron(0)–zirconium dioxide photocatalyst

Tomoki Oyumi,<sup>a</sup> Ikki Abe,<sup>a</sup> Masahito Sasaki,<sup>a</sup> and Yasuo Izumi<sup>\*a</sup>

### 1. Introduction

First-row transition metals such as Ti, V, Cr, Mn, Fe, Co, and Ni present promising inexpensive alternatives as photocatalytic active

components for CO<sub>2</sub> reduction, potentially replacing currently preferred but expensive Cu, Ag, and Pt metals.<sup>S1,S2</sup>

**Table S1** Reported photocatalysts that utilize Fe as active sites.

| Entry | Photocatalyst                                                  | Reducing agent   | Product             | Formation rate                                                                                                 | Ref. |
|-------|----------------------------------------------------------------|------------------|---------------------|----------------------------------------------------------------------------------------------------------------|------|
| a     | Fe–MIL-100                                                     | TEOA             | Formate             | 150 $\mu\text{mol h}^{-1} \text{g}_{\text{cat}}^{-1}$                                                          | S3   |
| b     | g-C <sub>3</sub> N <sub>4</sub> –Fe–MIL-88B                    |                  | CO                  | 13 $\mu\text{mol h}^{-1} \text{g}_{\text{cat}}^{-1}$                                                           | S4   |
| c     | FeO <sub>x</sub> –In <sub>2</sub> O <sub>3</sub>               |                  | CO                  | 4.8 $\text{mmol h}^{-1} \text{g}_{\text{cat}}^{-1}$                                                            | S5   |
| d     | Fe–TCPP–MOF                                                    |                  | CO                  | 10 $\text{mmol h}^{-1} \text{g}_{\text{cat}}^{-1}$                                                             | S6   |
| e     | Fe–N–MIL-101–rGO                                               | H <sub>2</sub> O |                     |                                                                                                                | S7   |
| f     | Fe–Ti–MXene                                                    | H <sub>2</sub> O | CO                  | 260 $\mu\text{mol h}^{-1} \text{g}_{\text{cat}}^{-1}$                                                          | S8   |
| g     | g-C <sub>3</sub> N <sub>4</sub> –Fe–PCN-222                    |                  | CO                  |                                                                                                                | S9   |
| h     | Fe–TiO <sub>2</sub>                                            |                  | CO, CH <sub>4</sub> | 21 $\mu\text{mol h}^{-1} \text{g}_{\text{cat}}^{-1}$ ,<br>40 $\mu\text{mol h}^{-1} \text{g}_{\text{cat}}^{-1}$ | S10  |
| i     | FeO <sub>x</sub> –MOF                                          |                  | CO                  | 170 $\mu\text{mol h}^{-1} \text{g}_{\text{cat}}^{-1}$                                                          | S11  |
| j     | Fe–COF                                                         | H <sub>2</sub> O | CO                  | 4.0 $\text{mmol h}^{-1} \text{g}_{\text{cat}}^{-1}$                                                            | S12  |
| k     | Fe–bpy–COF                                                     | BIH              | Formate, CO         | 4.1 $\text{mmol h}^{-1} \text{g}_{\text{cat}}^{-1}$ ,<br>2.1 $\text{mmol h}^{-1} \text{g}_{\text{cat}}^{-1}$   | S13  |
| l     | Fe <sub>2</sub> O <sub>3</sub> –Ti MXene                       | H <sub>2</sub> O | CO                  | 240 $\mu\text{mol h}^{-1} \text{g}_{\text{cat}}^{-1}$                                                          | S14  |
| m     | Fe–N <sub>3</sub> tpy                                          | TEA              | CO                  | 6.2 $\text{mmol h}^{-1} \text{g}_{\text{cat}}^{-1}$                                                            | S15  |
| n     | Fe <sub>2</sub> O <sub>3</sub> @In <sub>2</sub> S <sub>3</sub> | H <sub>2</sub> O | CO                  | 43 $\mu\text{mol h}^{-1} \text{g}_{\text{cat}}^{-1}$                                                           | S16  |
| o     | NH <sub>2</sub> –MIL-101(Fe)@Ti <sub>3</sub> C <sub>2</sub>    |                  | CO                  | 56 $\mu\text{mol h}^{-1} \text{g}_{\text{cat}}^{-1}$                                                           | S17  |
| p     | NH <sub>2</sub> –MIL-101(Fe)@Bi <sub>2</sub> MoO <sub>6</sub>  | TEOA             | CO                  | 67 $\mu\text{mol h}^{-1} \text{g}_{\text{cat}}^{-1}$                                                           | S18  |
| q     | Fe/Ti–BPDC MOF                                                 |                  | HCO <sub>2</sub> H  | 700 $\mu\text{mol g}^{-1} \text{h}^{-1}$                                                                       | S19  |
| r     | Fe <sub>3</sub> oxide–MOF                                      | IPA              | CO                  | 140 $\mu\text{mol h}^{-1}$                                                                                     | S20  |
| s     | Fe–Bi <sub>5</sub> O <sub>7</sub> I                            | H <sub>2</sub> O | CO                  | 12 $\mu\text{mol} \cdot \text{g}^{-1} \cdot \text{h}^{-1}$                                                     | S21  |
| t     | Fe–Bi <sub>2</sub> O <sub>2</sub> S                            |                  | CH <sub>4</sub>     | 1.7 $\mu\text{mol g}^{-1} \text{h}^{-1}$                                                                       | S22  |
| u     | Ferrocene–Ti cluster                                           | TEOA             | Formate             | 40 $\mu\text{mol g}^{-1} \text{h}^{-1}$                                                                        | S23  |
| v     | Fe(BPAbipy)                                                    | BIH              | CO                  | 52 $\mu\text{mol h}^{-1}$                                                                                      | S24  |

### 2. Experimental section

The Fe<sup>0</sup>-photocatalyst was synthesized via the following procedure. ZrO<sub>2</sub> (0.50 g, specific surface area: 100.5 m<sup>2</sup> g<sup>−1</sup>; Type JRC-ZRO-7,

Catalysis Society of Japan) was dispersed in deionized water (100 mL; conductivity <0.055  $\mu\text{S cm}^{-1}$ , model RFU424TA, Advantec, Japan) along with Fe(NO<sub>3</sub>)<sub>3</sub>·9H<sub>2</sub>O (0.2935 g). The suspension was ultrasonicated for 20 min before the dropwise addition of NaBH<sub>4</sub> (0.3298 g) dissolved in deionized water (20 mL) over 5 min. Major impurity of the ZrO<sub>2</sub> sample was Hf: 0.55 wt% in sample based on our X-ray absorption spectroscopy study. The reaction mixture was

<sup>a</sup> Department of Chemistry, Graduate School of Science, Chiba University, Yayoi 1-33, Inage-ku, Chiba 263-8522, Japan.

stirred at 900 rotations per minute (rpm) for 10 min, followed by filtration using a membrane filter (pore size = 0.1  $\mu\text{m}$ ; Omnipore Type JVWP04700, Merck–Millipore, Darmstadt, Germany) and washed five times with deionized water (50 mL). The resulting solid was initially dried at 373 K for 12 h, then further dried at 373 K for an additional 24 h. Finally, the sample was heated under  $\text{H}_2$  (21.7 kPa) at 973 K for 1 h. The obtained photocatalyst is referred to as  $\text{Fe}^0$  (7.5 wt %)- $\text{ZrO}_2$ -973R.

$\text{CO}$  photoreduction tests at the gas/solid interface were performed using 20 mg of the photocatalyst. The reaction was conducted in the presence of  $^{13}\text{CO}_2$  (2.3 kPa, chemical purity >99.9%; 99.0%  $^{13}\text{C}$ , 0.1%  $^{17}\text{O}$ , 0.7%  $^{18}\text{O}$ , Cambridge Isotope Laboratories, Inc., Tewksbury, MA, USA) and  $\text{H}_2$  (2.3–21.7 kPa, purity >99.99%). The photocatalyst was placed in a U-shaped quartz reactor and irradiated with ultraviolet–visible (UV–Vis) light from a 300 W Xe arc lamp (Model MAX 350, Asahi Spectra, Japan) via a quartz light guide (diameter: 5 mm).<sup>525</sup> The distance between the fiber light exit and the photocatalyst was maintained at 2 cm. The light intensity at the center of the sample was adjusted between 110 and 472  $\text{mW cm}^{-2}$  (Table 1a–d', main text).  $\text{CO}_2$  photoreduction tests were also performed by cooling the quartz reactor with 2.5 L water in quartz bath (Chart S1).

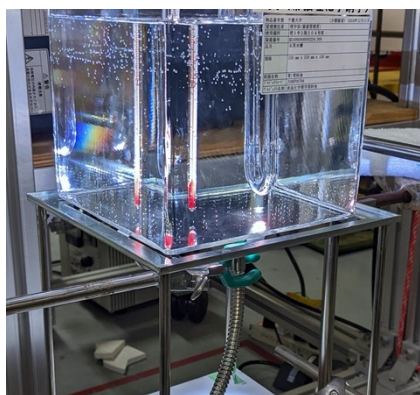

**Chart S1** A picture of  $\text{CO}_2$  photoreduction test by cooling the quartz reactor with 2.5 L water in quartz bath.

Online gas chromatography–mass spectrometry (GC–MS) analysis was performed using a JMS-Q1050GC (JEOL, Japan). A packed column of 13X-S molecular sieves (length: 3 m, internal diameter: 3 mm; GL Sciences, Inc., Japan) was used, with He (purity >99.99995%) as the carrier gas. The ionization energy of the separated gas was 20 eV. Detection of  $^{13}\text{CH}_4$  and  $^{12}\text{CH}_4$  relied on their mass-to-charge ratios ( $m/z$ ):  $^{13}\text{CH}_4$  at  $m/z = 17$  and  $^{12}\text{CH}_4$  at  $m/z = 16$ . The fragment ratio of  $\text{CH}_3^+$ :  $\text{CH}_4^+$  was 0.708:1. Similarly,  $^{13}\text{CO}$  was identified at  $m/z = 29$ ,  $^{13}\text{C}_2\text{H}_6$  and  $^{13}\text{C}_2\text{H}_4$  at  $m/z = 30$  as  $^{13}\text{C}_2\text{H}_4$  fragment,  $^{13}\text{C}_3\text{H}_8$  at  $m/z = 31$  as  $^{13}\text{C}_2\text{H}_5^+$  fragment, and  $^{13}\text{C}_3\text{H}_6$  at  $m/z = 44$  as  $^{13}\text{C}_3\text{H}_5^+$  fragment. All reactants and products were uniquely quantified based on their GC retention times in the mass chromatogram.

$\text{CO}_2$  photoconversion tests were conducted using  $\text{CO}_2$  (95 kPa) and  $\text{H}_2\text{O}$  (70 mL) with  $\text{NaHCO}_3$  (0.203 g, purity >99.5%; Wako Pure Chemical, Japan) dissolved in the solution. Photocatalyst samples

(2.7 mg), pretreated under  $\text{H}_2$  were sealed by flame and transferred to a Pyrex flask reactor under an Ar atmosphere using the Schlenk technique.  $\text{CO}_2$  (95 kPa) was circulated within a closed Pyrex glass system connected to the Pyrex flask, which was equipped with a quartz window containing the photocatalyst. The reactor was irradiated with UV–Vis light from a Model MAX-350 through a quartz light guide. The distance between the fiber light exit and the quartz window was 2 cm. The integrated light intensity for the suspended sample was measured at 367 mW per flask (Table 1e and e'). The suspension was stirred at 1,000 rpm, and the reaction gas was continuously bubbled using a gas circulation pump connected to the reactor during the photocatalytic reaction tests. Product analysis was performed using an online GC–thermal conductivity detector (Model GC-8AT, Shimadzu, Kyoto, Japan) equipped with a packed column of 13X-S molecular sieves (length: 3 m, internal diameter: 3 mm). Additionally, GC–MS analysis was conducted using a packed column of 13X-S molecular sieves, with He (purity >99.99995%) as the carrier gas in both cases.

UV–Vis spectra were recorded using a double-beam V-650 spectrometer (JASCO, Tokyo, Japan) equipped with  $\text{D}_2$  and halogen lamps for measurements below and above 340 nm, respectively. A photomultiplier tube and an integrated ISV-469 sphere were used for diffuse reflectance detection in the 200–800 nm range. Samples pretreated under  $\text{H}_2$  were transferred to an airtight cell using a vacuum-type glove box (UN-6509LCIY, Unico, Japan) under an Ar atmosphere. A polytetrafluoroethylene plate was used as the reference. Absorption and fluorescence spectra were recorded using an FP-8600 spectrometer (JASCO; Chiba Iodine Resource Innovation Center, Chiba University, Japan) equipped with a 150 W Xe arc lamp (Type UXL-159, Ushio, Japan) and a photomultiplier tube. Excitation was performed at 200 nm, and fluorescence emission was measured in the 300–800 nm range. The incident excitation light from the Xe lamp was monitored using a Si photodiode, and the detected fluorescence was normalized based on the incident light intensity at each wavelength. The photocatalyst powder (2.0 mg) was dispersed in deionized water (< 0.055  $\mu\text{S cm}^{-1}$ ; 3.0 mL) and ultrasonicated (430 W, 38 kHz) for 30 min. All spectra were recorded for the suspensions in a quartz cell at 295 K.

Fe K-edge X-ray absorption fine structure spectra were measured at beamline 9C of the Photon Factory, High Energy Accelerator Research Organization, Tsukuba, Japan. A Si (1 1 1) double-crystal monochromator was used to analyze X-rays emitted from the storage ring via a bending magnet. The monochromator was adjusted using a piezo transducer and focused using a bent cylindrical mirror coated with Rh. Photocatalyst samples were pretreated in a quartz U-tube and transferred to a Pyrex cell filled with reaction gas ( $\text{CO}_2 + \text{H}_2$ ). The cell was equipped with polyethylene terephthalate film (Toyobo, Japan, Type G2, 50  $\mu\text{m}$  thick) on both sides. A 300 W Xe arc lamp (Model MAX 350) served as the light source, with a fiber light exit positioned 3 cm from the photocatalyst (322  $\text{mW cm}^{-2}$ ).

X-ray diffraction patterns were recorded using a D8 ADVANCE diffractometer (Bruker, Billerica, MA, USA) at the Center for Analytical Instrumentation, Chiba University. The measurements

were conducted over a Bragg angle range of  $2\theta_B = 10^\circ\text{--}80^\circ$ , with a scan step of  $0.02^\circ$  and a scan rate of  $0.5\text{ s per step}$ . The instrument operated at  $40\text{ kV}$  and  $40\text{ mA}$ , utilizing  $\text{Cu K}\alpha$  radiation ( $\lambda = 0.15419\text{ nm}$ ) with a Ni filter.

In situ FTIR spectroscopy measurements were conducted at  $295\text{ K}$  using a model FT/IR-4200 spectrometer (JASCO, Tokyo, Japan) over a spectral range of  $4000\text{--}650\text{ cm}^{-1}$ . The Fe (7.5 wt%)- $\text{ZrO}_2$  photocatalyst disk (60 mg), mixed with an equal amount of  $\text{ZrO}_2$  (60 mg), was pretreated under  $\text{H}_2$  at  $973\text{ K}$  in a quartz cell and subsequently transferred to an FTIR cell under an Ar atmosphere using a vacuum-type glove box (UN-6509LCIY). A mixed gas of  $^{13}\text{CO}_2$  (2.3 kPa) and  $\text{H}_2$  (21.7 kPa) was introduced to the photocatalyst disk. The sample was then irradiated with UV-Vis light from a  $300\text{ W Xe}$  arc lamp (Model MAX 350) via a quartz fiber light guide. Finally, the FTIR cell containing the photocatalyst disk was evacuated using rotary and diffusion pumps ( $10^{-6}\text{ Pa}$ ). The fiber light exit was positioned  $3\text{ cm}$  from the sample disk, with an incident light intensity of  $265\text{ mW cm}^{-2}$ . The spectrometer was set to an energy resolution of  $1\text{ cm}^{-1}$ , and data accumulation was performed over 512 scans ( $\sim 2\text{ s per scan}$ ).

Spin-polarized periodic density functional (DFT) theory calculations were performed using the Vienna Ab initio Simulation Package code version 6.4.2<sup>S26</sup> on a WJ9J-W231 server equipped with an Intel Xeon w9-3495X processor (1.9 GHz, 56 cores; Tsukumo, Japan). Additionally, part of the computations was conducted using the supercomputer facilities at the Institute for Solid State Physics, University of Tokyo, Japan. The projector-augmented wave method was applied at the DFT-D3 level to account for van der Waals interactions. The generalized gradient approximation-revised Perdew-Burke-Ernzerhof exchange-correlation functional was utilized, with a plane-wave energy cutoff set at  $500\text{ eV}$ .

The convergence criterion was set at  $10^{-4}\text{ eV}$  for the self-consistent field cycle, and structural optimizations were considered converged when the forces on all atoms were smaller than  $1.0\text{ eV nm}^{-1}$ . All atoms were fully relaxed during structural optimization. The Brillouin zone was sampled using a  $3 \times 3 \times 1$  wave number vector  $k$ -point grid. The (1 1 1) surface of body-centered cubic Fe was modeled using a  $3 \times 3 \times 2$  unit cell slab, with a vacuum spacing of  $1.5\text{ nm}$  between slabs.<sup>S27</sup>

The adsorption energy ( $E_{\text{ads}}$ ) of  $\text{CO}_2$  was calculated based on eq. S1.

$$E_{\text{ads}} = E_{\text{mol/slab}} - E_{\text{mol}} - E_{\text{slab}}, \quad (\text{S1})$$

where  $E_{\text{mol/slab}}$  is the total energy of the adsorbate on the slab surface, and  $E_{\text{mol}}$  and  $E_{\text{slab}}$  are the energies of an isolated molecule in the gas phase and of the surface, respectively.

### 3. Results and discussion

#### 3-1. Photocatalytic $\text{CO}_2$ reduction tests

The  $^{13}\text{CO}$  formation rate using Fe (7.5 wt%)- $\text{ZrO}_2$ -973R photocatalyst @  $110\text{ mW cm}^{-2}$  until 5 h of photoreaction under  $^{13}\text{CO}_2$  (2.3 kPa) and  $\text{H}_2$  (21.7 kPa;  $3.7\text{ }\mu\text{mol h}^{-1}\text{ g}_{\text{cat}}^{-1}$ ; Table 1a) corresponds  $0.37\text{ }\mu\text{mol}$  of  $^{13}\text{CO}$  at 5 h. This exceeds the evaluated surface O vacancies ( $\text{V}_{\text{O}}^{\bullet\bullet}$ )

population:  $0.070\text{ }\mu\text{mol}$  per  $20\text{ mg}$  of photocatalyst (Table S3g and Fig. S7), and suggests that  $^{13}\text{CO}$  was photocatalytically formed rather than stoichiometric reaction of  $\text{CO}_2$  and  $\text{V}_{\text{O}}^{\bullet\bullet}$  to form CO filling in the O vacancy.

A photocatalytic reduction test of  $\text{CO}_2$  was performed in comparison to tests listed in Table 1 to verify  $\text{H}_2$  pressure dependence.  $^{13}\text{CO}_2$ :  $\text{H}_2$  ratio was 1: 9.4 in Table 1 while  $\text{CO}_2$  (or CO):  $\text{H}_2$  ratio was 1: (1–6) in tests in Table S4, except for reference S40. Therefore, a test at  $^{13}\text{CO}_2$ :  $\text{H}_2$  ratio of 1: 1 was performed irradiated by light at  $473\text{ mW cm}^{-2}$  (Table S2b and b'). In comparison to the test using  $^{13}\text{CO}_2$  and  $\text{H}_2$  with the ratio 1: 9.4 (entries c and c'), the formation rate of  $^{13}\text{CO}_2$  was suppressed to 40% while that of  $^{13}\text{CH}_4$  became 1.0% of rates under higher  $\text{H}_2$  pressure. Thus,  $\text{H}_2$  pressure dependence suppressed the progress of sequential reaction steps from  $\text{CO}_2$  to CO then  $\text{CH}_4$  (Scheme 1a).

Next, a reference photocatalytic test was also performed using  $\text{ZrO}_2$  reduced at  $973\text{ K}$  under  $\text{H}_2$  (Table S2a). The  $^{13}\text{CO}$  formation rate ( $1.7\text{ }\mu\text{mol h}^{-1}\text{ g}_{\text{cat}}^{-1}$ ) was significantly lower compared to initial  $^{13}\text{CH}_4$  formation rate under similar photocatalytic reaction conditions (Table 1b). Furthermore, no trend was found between reduction temperature of photocatalyst under  $\text{H}_2$  and the amount of chemisorbed  $\text{CO}_2$  (Table S3), corresponding to O vacancy on the  $\text{ZrO}_2$  surface. Thus, noncatalytic  $\text{CO}_2$  reduction to CO by the reaction of  $\text{V}_{\text{O}}^{\bullet\bullet}$  on  $\text{ZrO}_2$  created by reduction at high temperature under  $\text{H}_2$  was minimal in this study.

In the photocatalytic test using  $\text{CO}_2$  and  $\text{H}_2\text{O}$  (Fig. S1), sequential trend of primary water photosplitting was observed as the quick  $\text{O}_2$  evolution and secondary CO then  $\text{CH}_4$  generation. This trend suggested the inclusion of reverse water-gas shift reaction step (eq. S3).

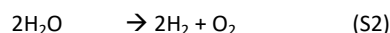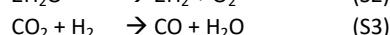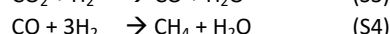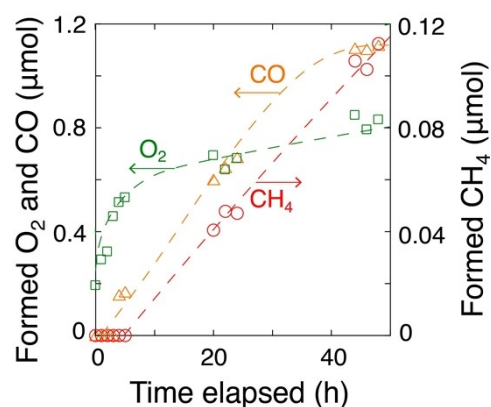

**Fig. S1** Time course of CO,  $\text{CH}_4$ , and  $\text{O}_2$  formation using  $\text{Fe}^0$  (7.5 wt%)- $\text{ZrO}_2$ -973R photocatalyst, with  $\text{CO}_2$  (95 kPa),  $\text{H}_2\text{O}$  (70 mL), and UV-Vis light irradiation at  $367\text{ mW per cell}$ . The  $\text{O}_2$  amount was corrected by subtracting the  $\text{N}_2$  amount multiplied by  $20.9/78.1$  at each time.

**Table S2** CO<sub>2</sub> photoreduction outcomes using ZrO<sub>2</sub> and Fe (7.5 wt%)-ZrO<sub>2</sub> both prerduced at 973 K in the presence of H<sub>2</sub>.

| Entry | Catalyst                      | <sup>13</sup> CO <sub>2</sub> | H <sub>2</sub> | Light intensity (mW cm <sup>-2</sup> ) | Stage of reaction test (h) | Formation rate (μmol h <sup>-1</sup> g <sub>cat</sub> <sup>-1</sup> ) |                               |                                             |                                             |                |
|-------|-------------------------------|-------------------------------|----------------|----------------------------------------|----------------------------|-----------------------------------------------------------------------|-------------------------------|---------------------------------------------|---------------------------------------------|----------------|
|       |                               |                               |                |                                        |                            | <sup>13</sup> CO                                                      | <sup>13</sup> CH <sub>4</sub> | <sup>13</sup> C <sub>2</sub> H <sub>6</sub> | <sup>13</sup> C <sub>3</sub> H <sub>8</sub> | O <sub>2</sub> |
| a     | ZrO <sub>2</sub>              | 2.3 kPa                       | 21.7 kPa       | 257                                    | 0–48                       | 1.7                                                                   | <0.002                        | <0.002                                      | <0.002                                      | <0.002         |
| b     | Fe (7.5 wt%)-ZrO <sub>2</sub> |                               | 2.3 kPa        | 473                                    | 0–5                        | 27.7                                                                  | 1.75                          | 0.0511                                      |                                             |                |
| b'    |                               |                               |                |                                        | 5–48                       | 13.4                                                                  | 0.213                         | 0.0302                                      |                                             |                |
| c     |                               |                               | 21.7 kPa       | 472                                    | 0–5                        | 69                                                                    | 170                           | 2.1                                         | 0.30                                        |                |
| c'    |                               |                               |                |                                        | 5–48                       | 18                                                                    | 20                            | 2.3                                         | 0.56                                        |                |

Entries c and c' are the same as Table 1c and c' for comparison to entries b and b'.

**Table S3** Chemisorbed amount of CO<sub>2</sub> during the photoexchange using ZrO<sub>2</sub>, Ag (5.0 wt%)-ZrO<sub>2</sub>, Au (5.0 wt%)-ZrO<sub>2</sub>, Ni (10 wt%)-ZrO<sub>2</sub>, Co (7.5 wt%)-ZrO<sub>2</sub>, and Fe (7.5 wt%)-ZrO<sub>2</sub> under UV–visible light irradiation

| Entry | <sup>13</sup> CO <sub>2</sub> (kPa) | Catalyst                      |             | Reduction temperature (K) | Chemisorbed CO <sub>2</sub> (μmol) | Reference |
|-------|-------------------------------------|-------------------------------|-------------|---------------------------|------------------------------------|-----------|
|       |                                     | Type                          | Amount (mg) |                           |                                    |           |
| a     | 0.67                                | ZrO <sub>2</sub>              | 100         | –                         | 2.3                                | S45       |
| b     |                                     | ZrO <sub>2</sub>              | 20          | 723                       | 0.66                               | S46       |
| c     |                                     | Ag (5.0 wt%)-ZrO <sub>2</sub> | 100         | –                         | 3.5                                | S45       |
| d     |                                     | Au (5.0 wt%)-ZrO <sub>2</sub> |             | –                         | 2.9                                | S47       |
| e     |                                     | Ni (10 wt%)-ZrO <sub>2</sub>  |             | 723                       | 0.54                               | S46       |
| f     | 0.68                                | Co (7.5 wt%)-ZrO <sub>2</sub> | 20          | 823                       | 0.050                              | S25       |
| g     | 0.69                                | Fe (7.5 wt%)-ZrO <sub>2</sub> |             | 973                       | 0.070                              | This work |

**Table S4** Reported thermal catalysts that utilize Fe as active sites for CO<sub>2</sub> and/or CO hydrogenation into hydrocarbon(s).

| Entry | Catalyst                                                                                           | $T_{\text{reduction}}$<br>(K) | Fe state                                                                   | $T_{\text{reaction}}$<br>(K) | Reactant                                                | Product              | Formation rate                                           | Ref.                                                     |     |
|-------|----------------------------------------------------------------------------------------------------|-------------------------------|----------------------------------------------------------------------------|------------------------------|---------------------------------------------------------|----------------------|----------------------------------------------------------|----------------------------------------------------------|-----|
| a     | Fe–CeO <sub>2</sub>                                                                                | 673                           | Fe <sup>2+</sup> , Fe <sup>3+</sup>                                        | 623                          | CO <sub>2</sub>                                         | CH <sub>4</sub>      | 26 mmol h <sup>−1</sup> g <sub>Fe</sub> <sup>−1</sup>    | S29                                                      |     |
| b     | Fe–Ce <sub>0.1</sub> Zr <sub>0.9</sub> O <sub>2</sub>                                              | 573 (Ar)                      |                                                                            | 573–773                      |                                                         |                      |                                                          | S30                                                      |     |
| c     | Fe–SiO <sub>2</sub>                                                                                | 623                           | γ-Fe <sub>2</sub> O <sub>3</sub>                                           | 673                          |                                                         |                      |                                                          | 0.97 mol h <sup>−1</sup> mol <sub>Fe</sub> <sup>−1</sup> | S31 |
| d     | Fe–CeO <sub>2</sub> –Al <sub>2</sub> O <sub>3</sub>                                                | 1023                          | Fe, Fe <sub>2</sub> O <sub>3</sub> and Fe <sub>3</sub> O <sub>4</sub>      | 683                          |                                                         |                      |                                                          | 6.2 mmol h <sup>−1</sup> g <sub>cat</sub> <sup>−1</sup>  | S32 |
| e     | Fe–mesoporous SiO <sub>2</sub>                                                                     | 623                           | Fe <sup>3+</sup>                                                           | 773                          |                                                         |                      |                                                          | 0.99 mmol h <sup>−1</sup> g <sub>cat</sub> <sup>−1</sup> | S33 |
| f     | Fe–mesoporous SiO <sub>2</sub>                                                                     | 773                           |                                                                            | 623                          |                                                         |                      |                                                          | 35 mol h <sup>−1</sup> mol <sub>Fe</sub> <sup>−1</sup>   | S34 |
| g     | Fe <sup>II</sup> (Fe <sup>III</sup> <sub>0.5</sub> Al <sub>0.5</sub> ) <sub>2</sub> O <sub>4</sub> |                               | Fe <sub>5</sub> C <sub>2</sub> , Fe <sub>7</sub> C <sub>3</sub> , Fe oxide | 593                          |                                                         |                      | 2.6 μmol h <sup>−1</sup> g <sub>cat</sub> <sup>−1</sup>  | S35                                                      |     |
| h     | Fe–Al <sub>2</sub> O <sub>3</sub>                                                                  |                               | Fe <sup>2+</sup> , Fe <sup>3+</sup>                                        | 673                          |                                                         | C <sub>1–12</sub> HC | 0.14 mol h <sup>−1</sup> g <sub>Fe</sub> <sup>−1</sup>   | S36                                                      |     |
|       | Fe–C                                                                                               |                               |                                                                            |                              |                                                         |                      | 0.068 mol h <sup>−1</sup> g <sub>Fe</sub> <sup>−1</sup>  |                                                          |     |
| i     | Fe <sup>II</sup> (Fe <sup>III</sup> <sub>0.5</sub> Al <sub>0.5</sub> ) <sub>2</sub> O <sub>4</sub> |                               | Fe <sub>5</sub> C <sub>2</sub> , Fe <sub>7</sub> C <sub>3</sub> , Fe oxide | 593                          |                                                         |                      | CH <sub>4</sub>                                          | 46 mmol h <sup>−1</sup> g <sub>cat</sub> <sup>−1</sup>   | S37 |
|       |                                                                                                    |                               |                                                                            |                              |                                                         |                      | C <sub>2–4</sub> HC                                      | 62 mmol h <sup>−1</sup> g <sub>cat</sub> <sup>−1</sup>   |     |
| j     | Fe(Fe <sub>0.5</sub> Al <sub>0.5</sub> ) <sub>2</sub> O <sub>4</sub>                               |                               | Fe <sub>5</sub> C <sub>2</sub> , Fe <sub>7</sub> C <sub>3</sub> , Fe oxide | 593                          | CO                                                      | CH <sub>4</sub>      | 46 mmol h <sup>−1</sup> g <sub>cat</sub> <sup>−1</sup>   | S38                                                      |     |
| k     | Fe–SiO <sub>2</sub>                                                                                |                               |                                                                            | 623                          |                                                         |                      | 0.52 mmol h <sup>−1</sup> g <sub>Fe</sub> <sup>−1</sup>  | S39                                                      |     |
|       |                                                                                                    |                               |                                                                            | 663                          |                                                         |                      | 1.4 mmol h <sup>−1</sup> g <sub>Fe</sub> <sup>−1</sup>   |                                                          |     |
| l     | Blast furnace sludge (Fe rich)                                                                     | 773                           | Fe <sub>2</sub> O <sub>3</sub> , Fe <sub>3</sub> O <sub>4</sub>            | 593                          |                                                         |                      | 0.16 mmol h <sup>−1</sup> g <sub>cat</sub> <sup>−1</sup> | S40                                                      |     |
| m     | Fe–Zn oxide                                                                                        | 613 (Ar)                      | Fe <sub>2</sub> C, Fe <sub>5</sub> C <sub>2</sub>                          | 613                          |                                                         | C <sub>1–5</sub> HC  | 5.0 mol h <sup>−1</sup> g <sub>Fe</sub> <sup>−1</sup>    | S41                                                      |     |
| n     | Fe–C                                                                                               | none                          |                                                                            | 548                          | 2.5 mmol h <sup>−1</sup> g <sub>cat</sub> <sup>−1</sup> |                      | S42                                                      |                                                          |     |
|       |                                                                                                    | 673                           |                                                                            |                              | 4.1 mmol h <sup>−1</sup> g <sub>cat</sub> <sup>−1</sup> |                      |                                                          |                                                          |     |

## 3-2. Characterizations

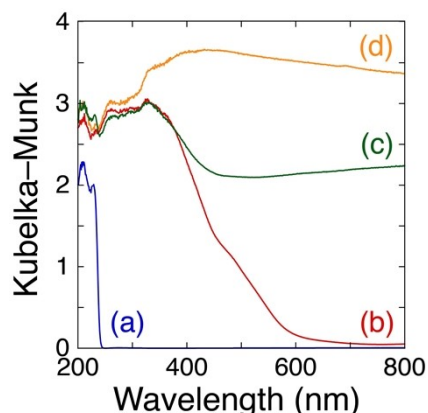

**Fig. S2** Diffuse-reflectance UV-Vis absorption spectra for (a)  $\text{ZrO}_2$ , (b) incipient  $\text{Fe}_3\text{O}_4\text{-ZrO}_2$ , (c)  $\text{Fe}^0$  (7.5 wt%)- $\text{ZrO}_2$ -973R, and (d)  $\text{Fe}^0$  (7.5 wt%)- $\text{ZrO}_2$ -973R after a 48-h photocatalytic  $^{13}\text{CO}_2$  reduction test.

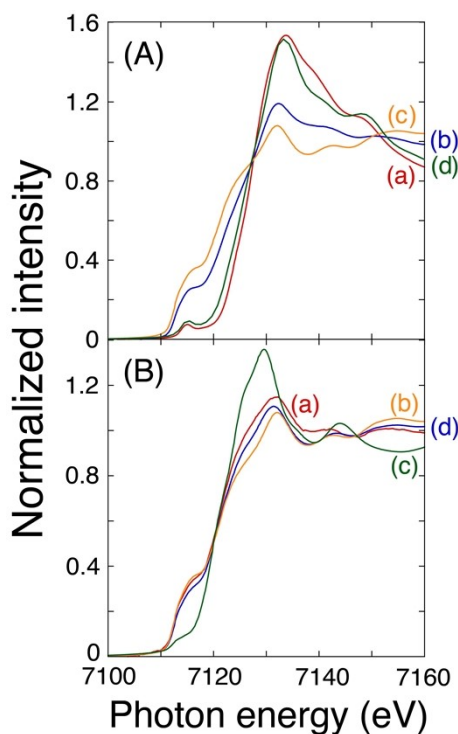

**Fig. S3** Normalized Fe K-edge X-ray absorption near-edge structures for (A) (a) incipient  $\text{Fe}_3\text{O}_4\text{-ZrO}_2$ , (b)  $\text{Fe}^0$  (5.0 wt%)- $\text{ZrO}_2$  reduced at 973 K, (c) standard  $\text{Fe}^0$  metal, and (d)  $\text{Fe}_3\text{O}_4$ ,<sup>S28</sup> and (B) (a)  $\text{Fe}^0$  (7.5 wt%)- $\text{ZrO}_2$ -973R under  $\text{CO}_2$  (2.3 kPa) and  $\text{H}_2$  (21.7 kPa) in the dark, (b) standard  $\text{Fe}^0$  metal, (c)  $\text{FeO}$ , and (d) the convolution spectrum of  $\text{Fe}^0$  metal and  $\text{FeO}$  with a mixing ratio of 8:2.

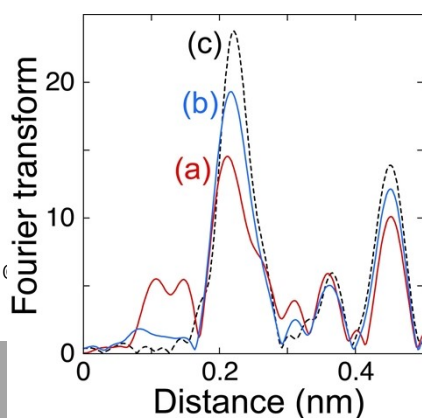

**Fig. S4** Fourier transform of angular wave number  $k^3$ -weighted Fe K-edge extended X-ray absorption fine structure measured for (a)  $\text{Fe}^0$  (5.0 wt%)- $\text{ZrO}_2$  and (b)  $\text{Fe}^0$  (20 wt%)- $\text{ZrO}_2$ , both reduced under  $\text{H}_2$  at 973 K, and (c)  $\text{Fe}^0$  foil (thickness 4  $\mu\text{m}$ ).

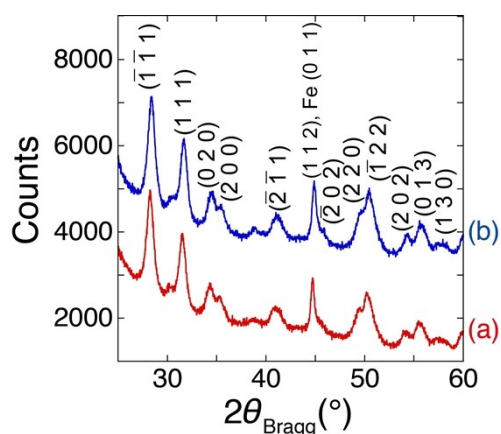

**Fig. S5** X-ray diffraction pattern for (a)  $\text{Fe}^0$  (7.5 wt%)- $\text{ZrO}_2$ -973R and (b)  $\text{Fe}^0$  (7.5 wt%)- $\text{ZrO}_2$ -973R after a 48-h photocatalytic  $^{13}\text{CO}_2$  reduction test.



Interband emission peaks may be owing to elemental impurity energy level<sup>S43</sup> as well as impurity energy level (Fig. S6; see main text). The major impurity in ZrO<sub>2</sub> employed was HfO<sub>2</sub>: Hf/(Zr + Hf) ratio was 0.77 wt% (see the Experimental section). A part of the peak at 468 nm in Fig. S6 may be owing to HfO<sub>2</sub>.<sup>S44</sup>

The <sup>13</sup>CO<sub>2</sub> exchange test using Fe<sup>0</sup> (7.5 wt%)-ZrO<sub>2</sub> showed quick adsorption of <sup>13</sup>CO<sub>2</sub> (99%) and <sup>12</sup>CO<sub>2</sub> (1%) (in total 20 μmol) followed by gas temperature increase (gas expansion) simulated by sigmoid function as well as slower adsorption of CO<sub>2</sub> (in total 4.1 μmol). The remaining term of relatively quick <sup>12</sup>CO<sub>2</sub> increase (0.070 μmol; Table S3g and Fig. S7) suggested preadsorbed <sup>12</sup>CO<sub>2</sub> on V<sub>O</sub><sup>••</sup> site.<sup>S25, S45–S47</sup> Based on this amount, surface V<sub>O</sub><sup>••</sup> sites were evaluated to one per 44 nm<sup>2</sup> (see main text).

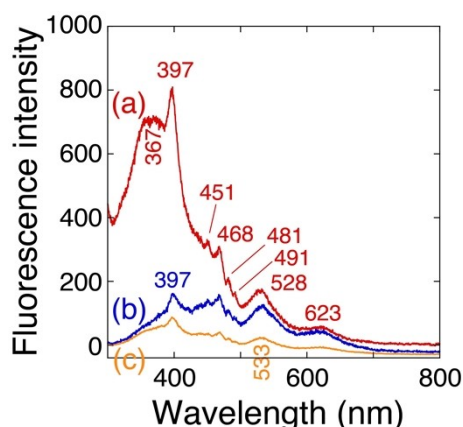

**Fig. S6** UV-Vis fluorescence emission spectra for (a) ZrO<sub>2</sub>, (b) incipient Fe<sub>3</sub>O<sub>4</sub>-ZrO<sub>2</sub>, and (c) Fe<sup>0</sup> (7.5 wt%)-ZrO<sub>2</sub>-973R at an excitation wavelength of 200 nm.

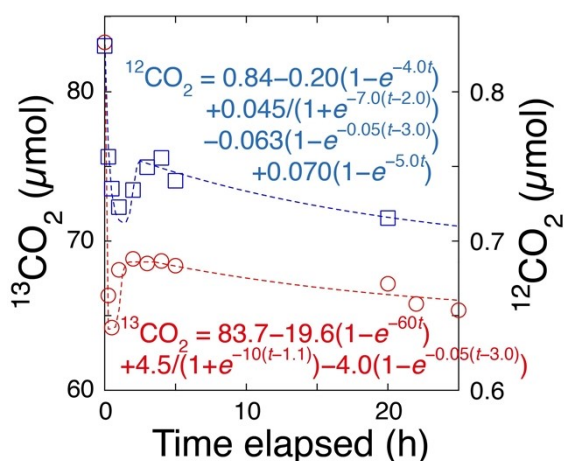

**Fig. S7** Time course of <sup>13</sup>CO<sub>2</sub> (0.69 kPa) exchange reaction using Fe<sup>0</sup> (7.5 wt%)-ZrO<sub>2</sub>-973R (20 mg) irradiated by UV-visible light (270 mW cm<sup>-2</sup>). Temperature change upon light irradiation was simulated by sigmoid function.

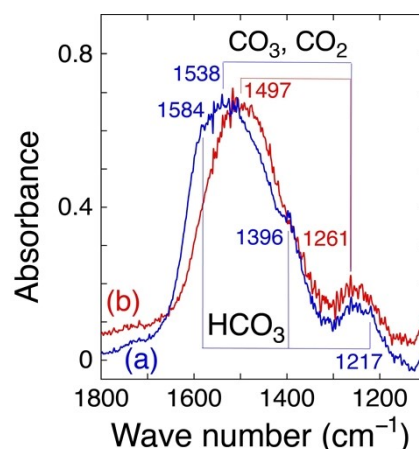

**Fig. S8** FTIR spectra for Fe<sup>0</sup> (7.5 wt%)-ZrO<sub>2</sub>-973R under <sup>13</sup>CO<sub>2</sub> (2.3 kPa) and H<sub>2</sub> (21.7 kPa) (a) and during UV-Vis light irradiation (265 mW cm<sup>-2</sup>; (b)).

## Author contributions

TO and IA did experiments and analyzed while MS did theoretical calculations. YI made plan and wrote paper.

## Acknowledgement

The authors are grateful for the financial support from the Grant-in-Aid for Scientific Research B (24K01522, 20H02834, YI) from the Japan Society for the Promotion of Science. X-ray absorption experiments were performed with the approval of the Photon Factory Proposal Review Committee (2024G067, 2022G527, 2021G546). The authors would like to thank Enago (www.enago.jp) for the language review.

## ORCID of the authors

|                 |                     |
|-----------------|---------------------|
| Tomoki Oyumi    | 0000-0002-8339-5161 |
| Ikki Abe        | 0009-0008-9732-6846 |
| Masahito Sasaki | 0009-0005-1088-3382 |
| Yasuo Izumi     | 0000-0001-8366-1864 |

## References

- Y. Izumi, *Coord. Chem. Rev.*, 2013, **257**, 171–186.
- Y. Izumi, ACS Books "Advances in CO<sub>2</sub> Capture, Sequestration, and Conversion", F. Jin, L.-N. He, and Y. H. Hu, Eds., ACS Symposium Series; ACS Publications, 2015; Volume **1194**, Chapter 1, pp 1–46.
- D. Wang, R. Huang, W. Liu, D. Sun, and Z. Li, *ACS Catal.*, 2014, **4**, 4254–4260.
- Z. Lyu, L. Chen, J. Yin, T. Wu, K. Zhao, S. Shen, W. Wang, and L. Ge, *Separation Purification Technol.*, 2025, **354**, 129431.
- Z. Wang, H. Yuan, Y. Jia, L. Guo, H. Wang, and W. Dai, *Separation Purification Technol.*, 2025, **353**, 128392.
- X. Zhao, C. X. Tang, Q. Xu, H. Rao, D.-Y. Du, P. She, and J.-S. Qin, *J. Catal.*, 2024, **439**, 115745.
- A. Arash and L. Vafajoo, *Reac. Kinetics Mech. Catal.*, 2024, **137**, 1789–1803.
- W. Feng, P. Zhu, S. Li, J. Fu, H. Niu, Z. Ren, S. Liu, L. Zheng, D. Zhao, and J. Zhang, *J. Mater. Chem. A*, 2024, **12**, 14437–14445.

- S9 D. Zhou, X. Zhang, Z. Li, J. Zhang, T. Wang, and S. Cao, *Appl. Catal. B*, 2024, **344**, 1123639.
- S10 A.-Y. Lo, C.-C. Wang, J. Huang, Y.-C. Chung, and Y.-C. Chang, *J. Environ. Chem. Eng.*, 2024, **12**, 112351.
- S11 T. Tian, X. Hu, Y. Li, Y. Bai, and B. Cai, *J. Environ. Chem. Eng.*, 2024, **12**, 112300.
- S12 S. Gao, X. Zhao, Q. Zhang, L. guo, Z. Li, H. Wang, S. Zhang, and J. Wang, *Chem. Sci.*, 2025, **16**, 1222–1232.
- S13 Y.-K. Zhang, L. Zhao, A. O. Terent'ev, and L.-N. He, *J. Mater. Chem. A*, 2025, **13**, 1407–1419.
- S14 J. Wu, W. Wang, X. Chen, Q. Luo, C. Yan, Z. Jiao, and Y. Li, *Adv. Sci.*, 2024, **12**, 2409002.
- S15 Y. Fang, X. Hong, and D. Chao, *Inorg. Chem. Front.*, 2024, **11**, 562–570.
- S16 X. Ma, D. Li, H. Jin, X. Zeng, J. Qi, Z. Yang, F. You, and F. Yuan, *J. Colloid Interface Sci.*, 2023, **648**, 1025–1033.
- S17 Q. Xu, Y. Sun, T. Lv, and H. Liu, *J. Alloys Comp.*, 2023, **954**, 170088.
- S18 H. Feng, Y. Sun, Q. Xu, and H. Liu, *Appl. Catal. A*, 2023, **664**, 119350.
- S19 X. He, X. Gao, X. Chen, S. Hu, F. Tan, Y. Xiong, R. Long, M. Liu, E. C. M. Tse, F. Wei, H. Yang, J. Hou, C. Song, and X. Guo, *Appl. Catal. B*, 2023, **327**, 122418.
- S20 J. Li, K. Ma, C. Li, Z. Shi, and S. Feng, *ACS Appl. Mater. Interfaces*, 2023, **15**, 26619–26626.
- S21 Y. Wang, C. Ban, J. Meng, J. Ma, H. Zou, Y. Feng, and J. Ding, *Separation Purification Technol.*, 2023, **312**, 123379.
- S22 Y. Luo, H. Han, J. Li, Q. Wang, W. Zhang, and Y. Jia, *Separation Purification Technol.*, 2023, **306**, 122734.
- S23 X. Chen, Y. Li, Z. Wei, S. Li, and S. Pang, *J. Phys. Conf. Ser.*, 2023, **2587**, 012100.
- S24 X.-Z. Wang, S.-L. Meng, J.-Y. Chen, H.-X. Wang, Y. Wang, S. Zhou, X.-B. Li, R.-Z. Liao, C.-H. Tung, and L.-Z. Wu, *Angew. Chem. Int. Ed.*, 2021, **60**, 26072–26079.
- S25 T. Loumissi, R. Ishii, K. Hara, T. Oyumi, I. Abe, C. Li, H. Zhang, R. Hirayama, K. Niki, T. Itoi, and Y. Izumi, *Angew. Chem. Int. Ed.*, 2024, **63**, e202412090.
- S26 G. Kresse and J. Furthmüller, *Phys. Rev. B*, 1996, **54**, 11169–11186.
- S27 K. Hara, M. Nozaki, R. Hirayama, R. Ishii, K. Niki, and Y. Izumi, *J. Phys. Chem. C*, 2023, **127**, 1776–1788.
- S28 <https://doi.org/10.48505/nims.3647>, provided by Dr. Y. Niwa, High Energy Accelerator Research Organization.
- S29 M. Lykaki, S. Stefa, G. Varvoutis, V. D. Binas, G. E. Marnellos, and M. Konsalakis, *Catalysts*, 2024, **14**, 611.
- S30 S. Biswas, C. Kundu, W. L. Ng, S. P. Samudrala, T. Jarvis, S. Giddey, and S. Bhattacharya, *J. CO<sub>2</sub> Utilization*, 2023, **72**, 102501.
- S31 J. Kirchner, C. Zambrzycki, S. Kureti, and R. Güttel, *Chem. Ing. Tech.*, 2020, **92**, 603–607.
- S32 L. Yang, L. Pastor-Pérez, J. J. Villora-Pico, S. Gu, A. Sepúlveda-Escribano, and T. R. Reina, *Appl. Catal. A*, 2020, **593**, 117442.
- S33 R. Merkache, I. Fechete, M. Maamache, M. Bernard, P. Turek, K. Al-Dalama, and F. Garin, *Appl. Catal. A*, 2015, **504**, 672–681.
- S34 M. A. A. Aziz, A. A. Jalil, S. Triwahyono, and S. M. Sidik, *Appl. Catal. A*, 2014, **486**, 115–122.
- S35 N. Utsis, R. Vidruk-Nehemya, M. V. Landau, and M. Herskowitz, *Faraday Discuss.*, 2016, **188**, 545–563.
- S36 V. I. Bogdan, A. E. Koklin, A. L. Kustov, Y. A. Pokusaeva, T. V. Bogdan, and L. M. Kustov, *Molecules*, 2021, **26**, 2883.
- S37 M. V. Landau, N. Meiri, N. Utsis, R. V. Nehemya, and M. Herskowitz, *Ind. Eng. Chem. Resear.*, 2017, **66**, 13334–13366.
- S38 N. Meiri, Y. Dinburg, M. Amoyal, V. Koukouliev, R. V. Nehemya, M. V. Landau, and M. Herskowitz, *Faraday Discuss.*, 2015, **183**, 197–215.
- S39 C. Zambrzycki and R. Güttel, *Reactions*, 2022, **3**, 374–391.
- S40 P. M. Bravo, R. Juménez, F. Devred, D. P. Debecker, C. Ulloa, and X. García, *Fuel*, 2020, **276**, 118045.
- S41 X. Han, S. Huang, C. Wei, H. Liang, J. Lv, Y. Wang, M.-Y. Wang, and X. Ma, *ACS Catal.*, 2024, **14**, 18354–18364.
- S42 J. M. Martín-Martínez and M. A. Vannice, *Ind. Eng. Chem. Res.*, 1991, **30**, 2263–2275.
- S43 B. Kortewille, A. Springer, and J. Strunk, *Catal. Commun.*, 2021, **152**, 106286.
- S44 A. F. Soares, S. H. Tatum, R. R. Rocca, L. C. Courrol, *J. Luminescence*, 2020, **219**, 116866.
- S45 H. Zhang, T. Itoi, T. Konishi, and Y. Izumi, *J. Am. Chem. Soc.*, 2019, **141**, 6292–6301.
- S46 H. Zhang, T. Itoi, T. Konishi, and Y. Izumi, *Angew. Chem. Int. Ed.*, 2021, **60**, 9045–9054.
- S47 H. Zhang, T. Itoi, K. Niki, T. Konishi, and Y. Izumi, *Catal. Today*, 2020, **356**, 544–556.
